# Supplementary material for: Bismuth tungstate incorporated zirconium metal–organic framework composite with enhanced visible-light photocatalytic performance
Source: Royal Society of Chemistry journal article supplement (doi:10.1039/c4ra13000f), 2014-11-21
Supplement: c4ra13000f1.pdf [file c4ra13000f1.pdf]

*Electronic Supplementary Information for*

**Bismuth Tungstate Incorporated Zirconium Metal-  
Organic Framework Composite with Enhanced  
Visible-light Photocatalytic Performance**

Zhou Sha,<sup>a,b</sup> Jiulong Sun,<sup>a,b</sup> Hardy Sze On Chan,<sup>a</sup> Stephan Jaenicke<sup>a,b,\*\*</sup>, Jishan  
Wu<sup>a,b,\*</sup>

<sup>a</sup> Department of Chemistry, National University of Singapore, 3 Science Drive 3,  
Singapore 117543

<sup>b</sup> NUS Environmental Research Institute, National University of Singapore, 5A  
Engineering Drive 1, #02-01, Singapore 117411

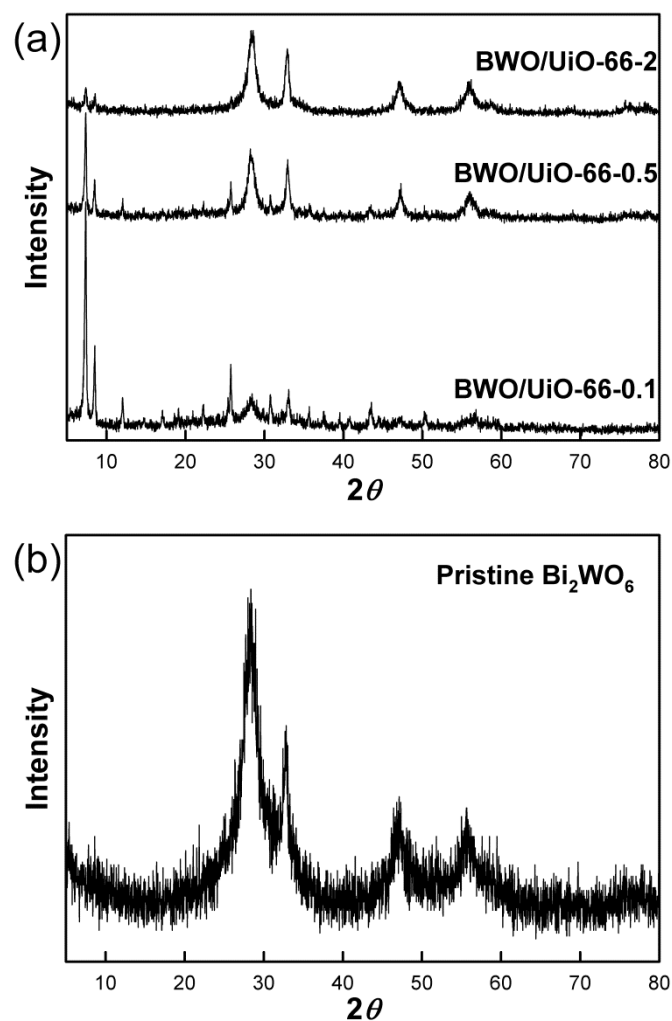

**Fig. S1** XRD patterns of (a) BWO/Uio-66-0.1, BWO/Uio-66-0.5, BWO/Uio-66-2, and (b) pristine  $\text{Bi}_2\text{WO}_6$ .

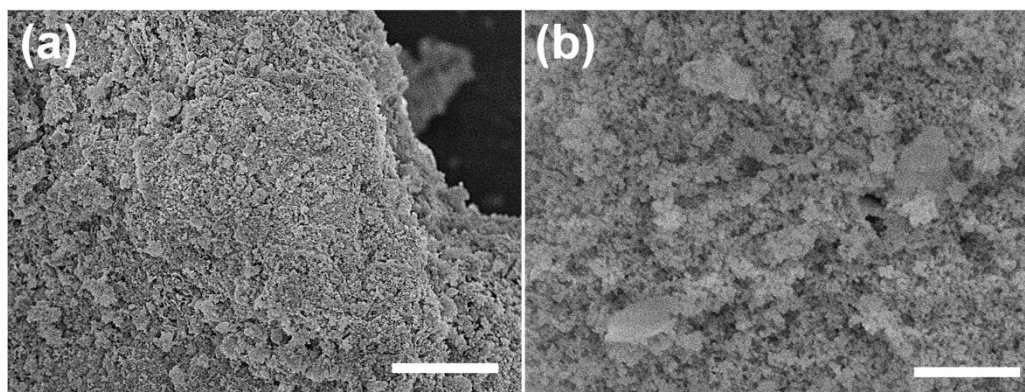

**Fig. S2** SEM images of pristine  $\text{Bi}_2\text{WO}_6$  (scale bars are 5  $\mu\text{m}$  in (a), and 500 nm in (b)).

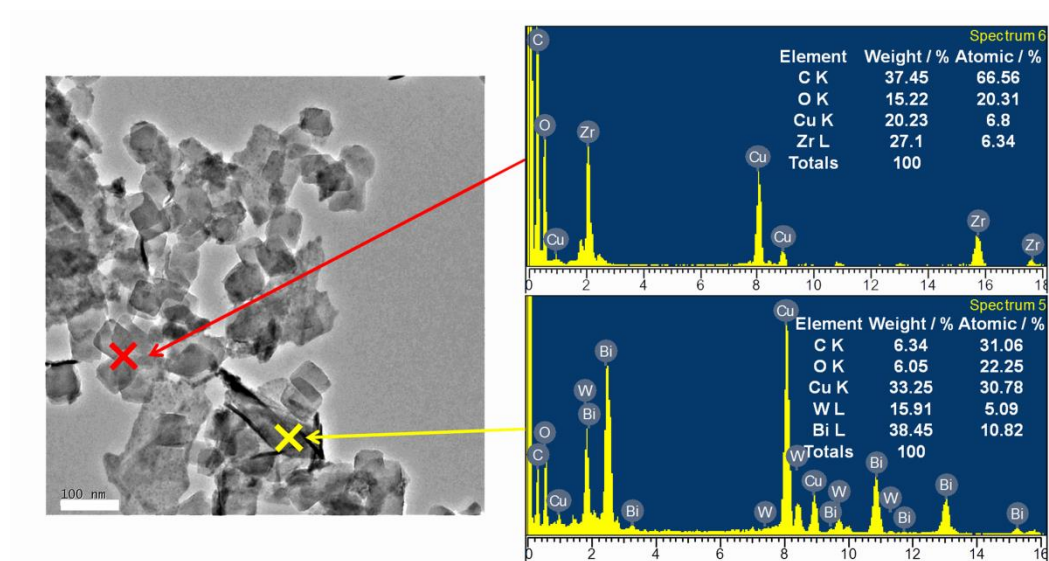

**Fig. S3** EDX spectra of the corresponding measure spots in the TEM image of BWO/Uio-66-1 (scale bar is 100 nm). Inserts in the spectra show the contents of corresponding elements (copper element is due to the TEM grid).

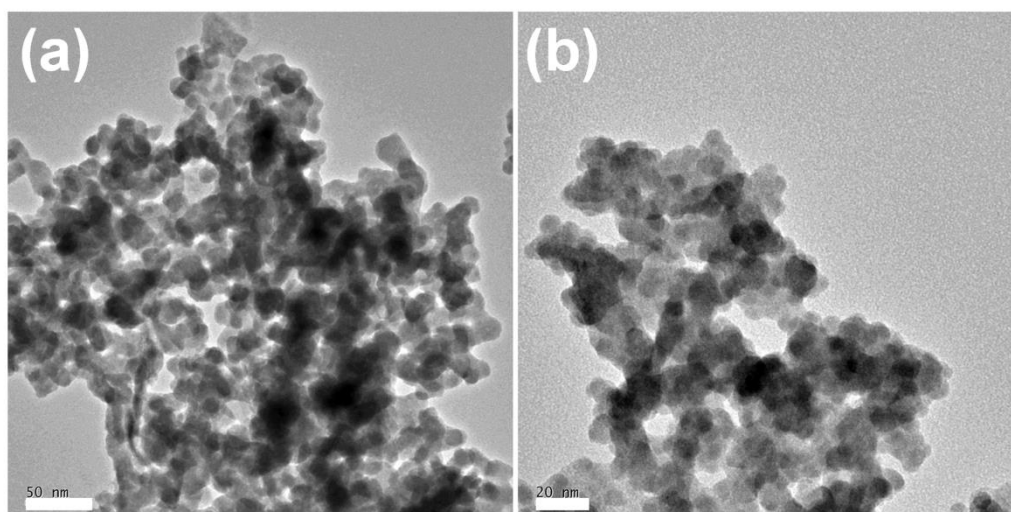

**Fig. S4** TEM images of pristine  $\text{Bi}_2\text{WO}_6$  (scale bars are 50 nm in (a), and 20 nm in (b)).

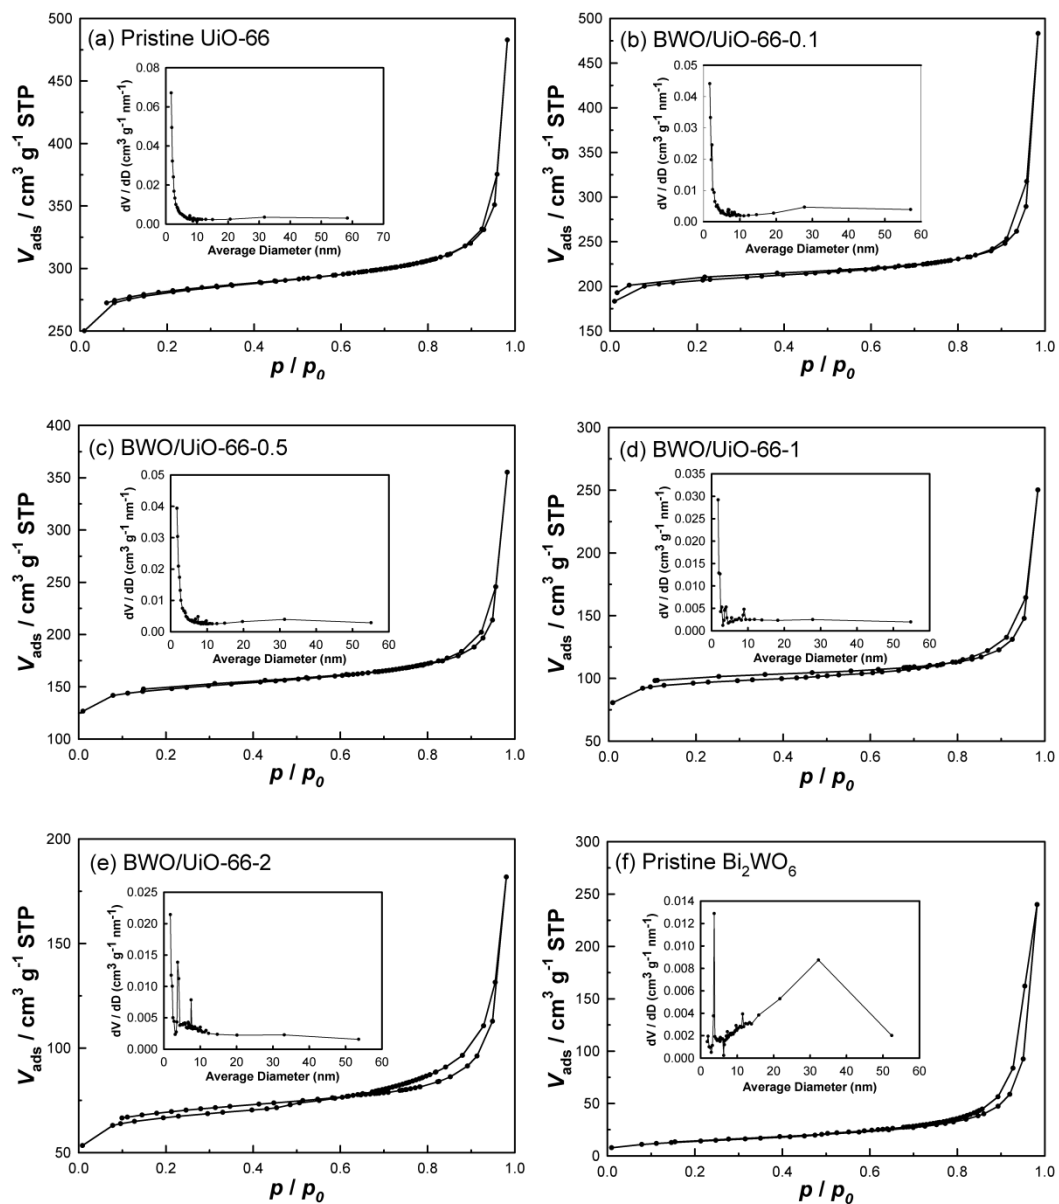

**Fig. S5** Nitrogen adsorption-desorption isotherms and pore size distributions (inset) of (a) pristine UiO-66, (b) BWO/UiO-66-0.1, (c) BWO/UiO-66-0.5, (d) BWO/UiO-66-1, (e) BWO/UiO-66-2, and (f) pristine  $\text{Bi}_2\text{WO}_6$ .

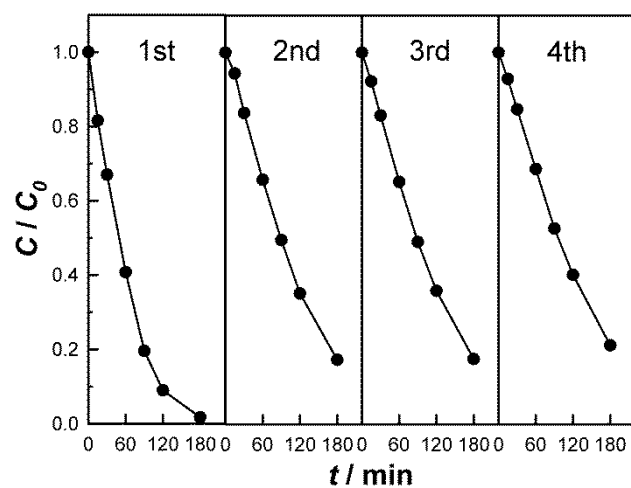

**Fig. S6** Four cycles of the RhB degradation in the presence of BWO/UiO-66-1 under visible-light irradiation.

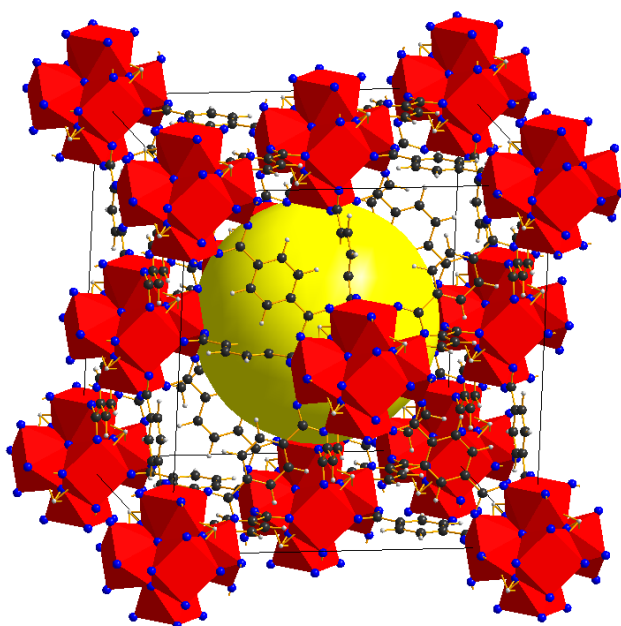

**Fig. S7** Crystal structural illustration of UiO-66. Zirconium, oxygen, carbon, and hydrogen atoms are represented in red, blue, black, and gray, respectively. The large yellow sphere represents the enclosed cavity.

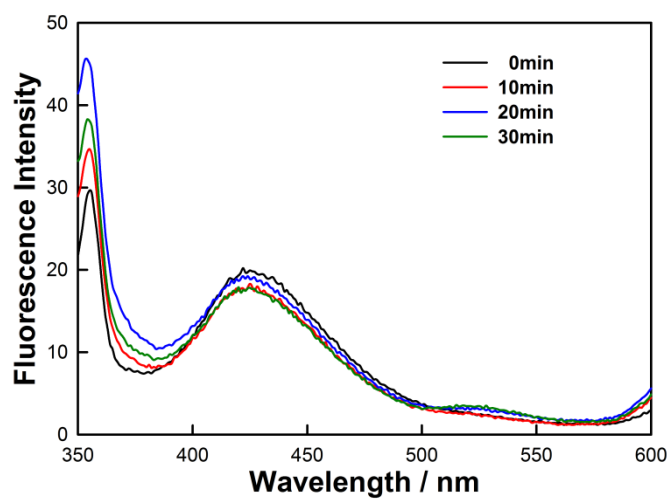

**Fig. S8** Photoluminescence spectral changes with visible-light irradiation time in the presence of BWO/UiO-66-1 in a  $5 \times 10^{-4}$  M basic solution of terephthalic acid.
